# Supplementary material for: A Magnetic Adsorbent for the Removal of Cationic Dyes from Wastewater
Source: MDPI journal article supplement (doi:10.3390/nano8090710), 2018-09-10
Supplement: s1 [file s1]

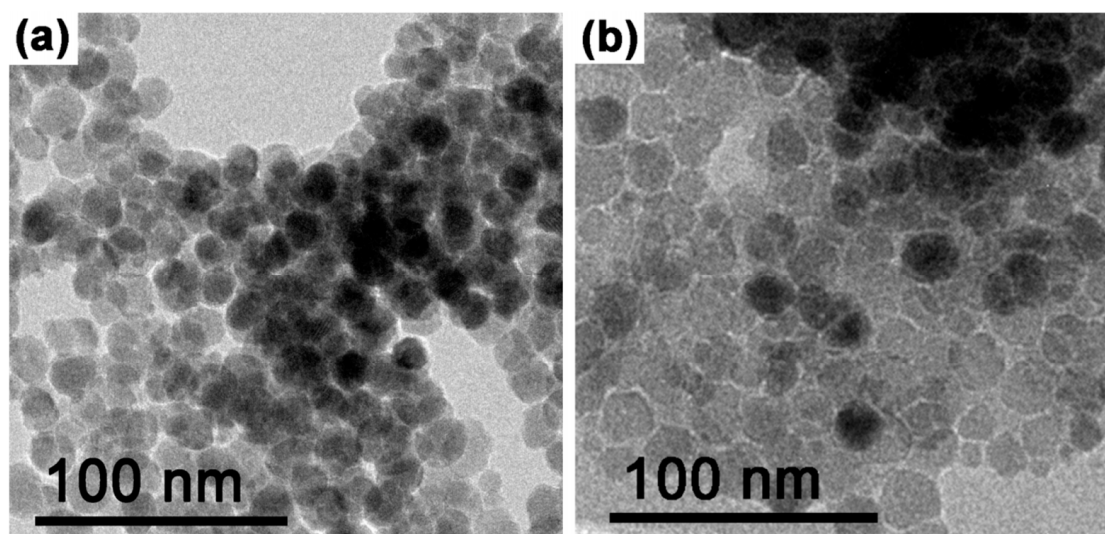

**Figure S1.** TEM analyses, (a) morphology image of  $\text{Fe}_3\text{O}_4$  and (b) morphology image of  $\text{Fe}_3\text{O}_4@1$ .

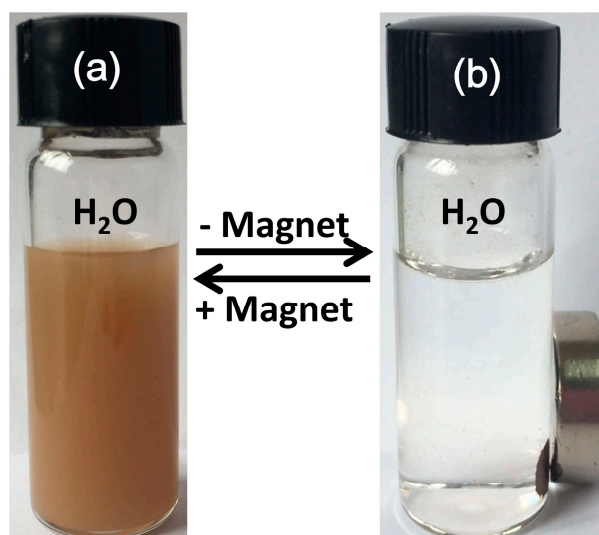

**Figure S2.** Photographs of the dispersion-collection process of  $\text{Fe}_3\text{O}_4@1$  in water.

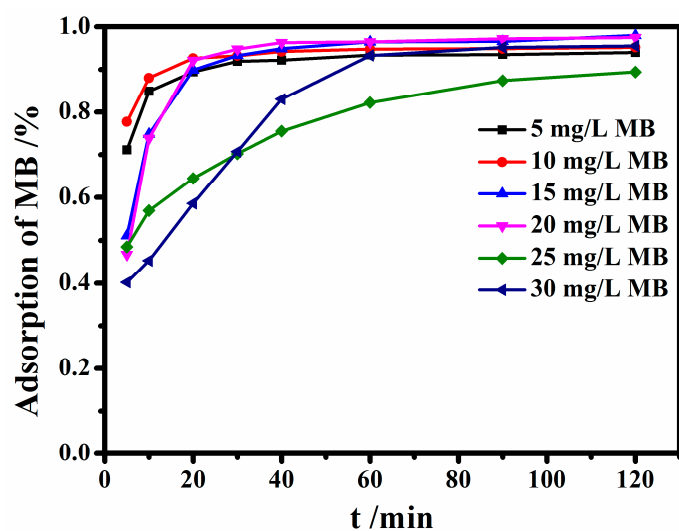

**Figure S3.** Adsorption capacity of  $\text{Fe}_3\text{O}_4@1$  with various initial concentrations of MB in solution.

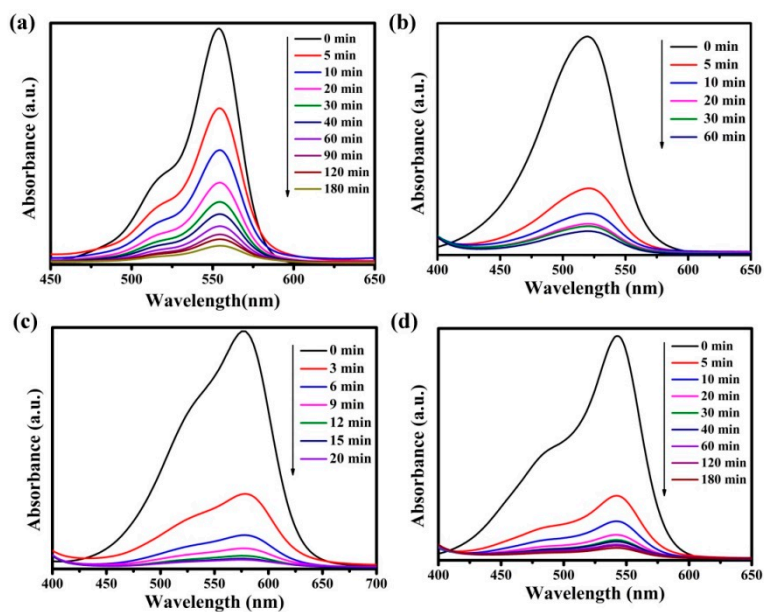

**Figure S4.** Adsorption spectra of the RhB solution (a); the T solution (b); the GV solution (c) and the FB solution (d) under the dark in presence of  $\text{Fe}_3\text{O}_4@1$ .
